# Supplementary material for: Groundwater resources decline in Apennine Mountain areas (central Italy): climate change or hidden consumer?
Source: Research Square preprint supplement (doi:10.21203/rs.3.rs-8347102/v1), 2026-02-02
Supplement: Supplementary file 1 [file 57508319c0eed52beb93fa96.docx]

Appendix A

Supplementary Material

**Groundwater resources decline in Apennine Mountain areas** **(central Italy): climate change or hidden consumer?**

Francesco Lampaa,*, Steffen Birkb, Marco Materazzia, Thomas Wagnerb, Carlo Iannia

a School of Science and Technology-Geology Division, University of Camerino, Via Gentile III da Varano 7, 62032 Camerino, Italy

b Department of Earth Sciences, NAWI Graz Geocenter, University of Graz, 8010 Graz, Austria

| **Meteorological stations** | | | | | | | | |
| --- | --- | --- | --- | --- | --- | --- | --- | --- |
| **ID** | **Name** | **Elev. (m asl)** | **ID** | **Name** | **Elev. (m asl)** | **ID** | **Name** | **Elev. (m asl)** |
| 1 | Pievebovigliana | 414 | 13 | Pizzo Tre Vescovi | 1811 | 25 | Monte Prata | 1792 |
| 2 | Muccia | 430 | 14 | Ussita | 730 | 26 | Ponte Buggianino | 407 |
| 3 | Serravalle di Chienti | 755 | 15 | Montefortino | 773 | 27 | Abeto | 946 |
| 4 | Fiastra Tribbio | 745 | 16 | Endesa | 640 | 28 | Astorara | 1013 |
| 5 | Cesi | 862 | 17 | Isola San Biagio | 1247 | 29 | Castelluccio di Norcia | 1351 |
| 6 | Sassotetto | 1353 | 18 | Monte Bove Sud | 1903 | 30 | Monte Vettore | 2068 |
| S7 | Cupi | 952 | 19 | Ponte Tavola | 708 | 31 | Forsivo | 963 |
| 8 | Monte Valvasseto | 1474 | 20 | Montemonaco | 997 | 32 | Norcia | 691 |
| 9 | Bolognola | 1074 | 21 | Sibilla | 1730 | 33 | Arquata del Tronto | 719 |
| 10 | Pintura di Bolognola | 1342 | 22 | Sellano | 605 | 34 | Forca Canapine | 1652 |
| 11 | Monte Cavallo | 956 | 23 | Gualdo | 996 | 35 | Capodacqua | 844 |
| 12 | Pian di Pao | 1555 | 24 | Preci | 602 |  |  |  |

Table S1 List of the meteorological stations.

| **Main springs** | | | | | | | |
| --- | --- | --- | --- | --- | --- | --- | --- |
| **ID** | **Name** | **ID** | **Name** | **ID** | **Name** | **ID** | **Name** |
| 1 | Valcimarra | 11 | Brecciosa | 21 | Vena d'Acqua | 31 | I Trocchi |
| 2 | La Folla | 12 | Faggi | 22 | Acqua Arva | 32 | Capo d'Acqua |
| 3 | Le Vene | 13 | Capodacqua | 23 | Panico | 33 | Sasso Spaccato |
| 4 | Boccafornace | 14 | Mezzavalle | 24 | Vene | 34 | Capregna |
| 5 | Rio Fessa | 15 | Anginelli | 25 | Capotenna | 35 | Le Marcite |
| 6 | Podalla | 16 | Gorga | 26 | Sorgente Alta | 36 | Torbidone |
| 7 | Caprareccia | 17 | Salette | 27 | Civitetto | 37 | Fontanelle |
| 8 | Fonte Grande | 18 | Capovena | 28 | San Chiodo | 38 | San Pellegrino |
| 9 | Peschiera | 19 | Rasiglia Alzabove | 29 | Sorgenti del Nera | 39 | Pescara del Tronto |
| 10 | Trocchi | 20 | Acqua del Ciliegio | 30 | Foce di Montemonaco | 40 | Capodacqua del Tronto |

Table S2 List of the main springs.

| **Component** | **Variable** | **Data source** | **Time step** | **Period of data availability** |
| --- | --- | --- | --- | --- |
| Climate | P | SIRMIP | daily monthly | var - present |
| AMAP |
| SF | SIR Umbria |
| T | ARSIAL |
| PC Lazio |
| Punctual springs | Qs | CIIP Tennacola | daily monthly | var - present |
| ARPA Umbria | 1998 - present |
| Linear springs | Q | AS | daily monthly | 2019 - 2022 |
| Boni and Petitta (2007) | 2006 - 2007 |
| SIRMIP | var - present |
| SIR Umbria | var - present |
| Land use | A | IGM GAI | 1954 | |
| MF | 1978 | |
| CLC 2000 | 2000 | |
| CLC 2018 | 2018 | |

Table S3 Data collection summary table. P - cumulative precipitation; SF - snowfall; T - air temperature; Qs - spring and river discharges; A - Land use area; SIRMIP - Marche region Civil Protection Agency Information System; AMAP - Marche region Agriculture and Fishing Agency; SIR Umbria - Umbria region Hydrographic Service; ARSIAL - Lazio region Agrometeorological Service; PC Lazio - Lazio region Civil Protection Agency; CIIP, Tennacola - water consortium managers; ARPA Umbria - Umbria region Environmental Protection Agency; AS - Sibillini Mountains Aqueduct measurements; IGM GAI - Aerial photos of IGM GAI flight (1954-1955); MF - Aerial photos of Marche Flight (1977-1979); CLC 2000 and 2018 - CORINE Land Cover 2000 and 2018. The abbreviation “var” under “Period of data availability” indicates great variability regarding the 1st year of the time series.


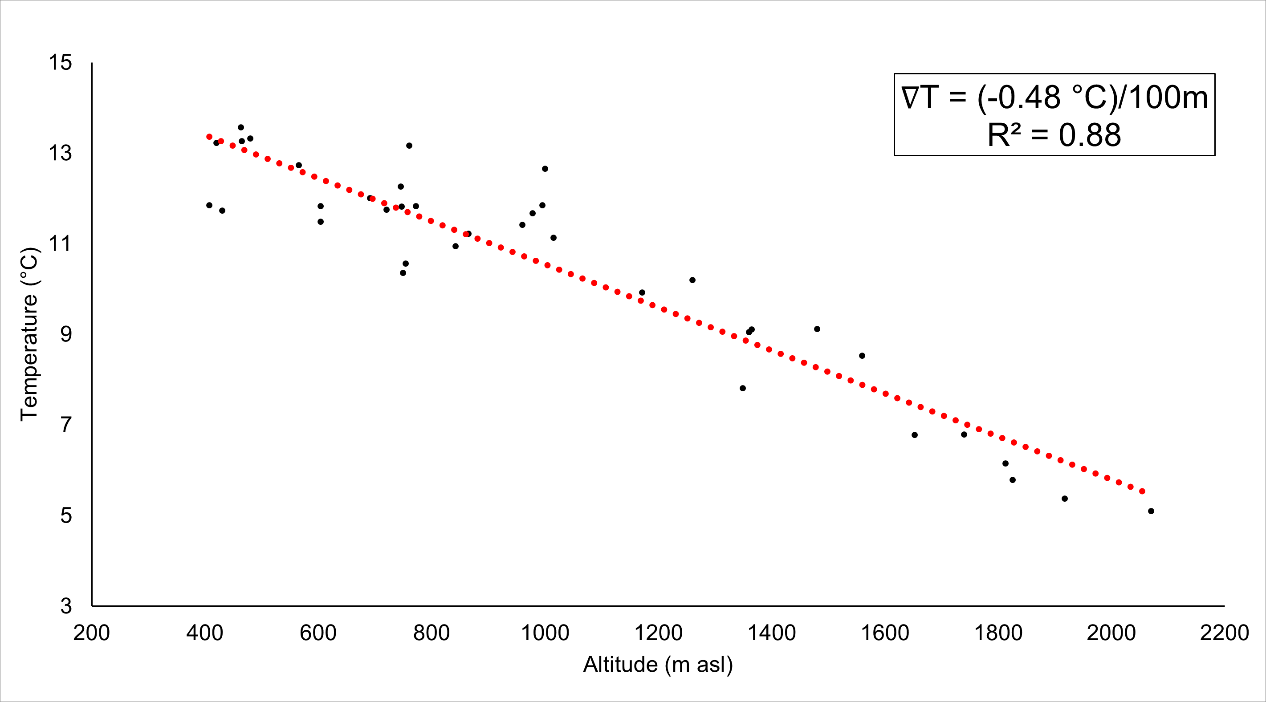


Fig. S1 The altitude-temperature gradient for the study area.


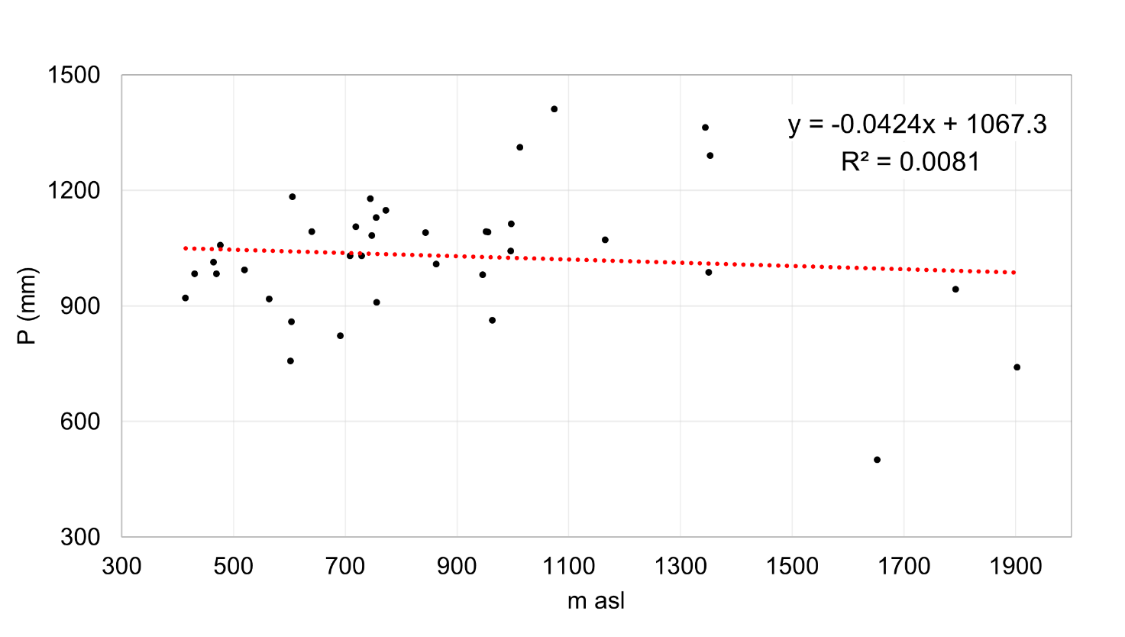


Fig. S2 Altitude vs Annual cumulative precipitation. Note that the elevation range for the precipitation data is more limited than that for air temperature (Fig. S1).


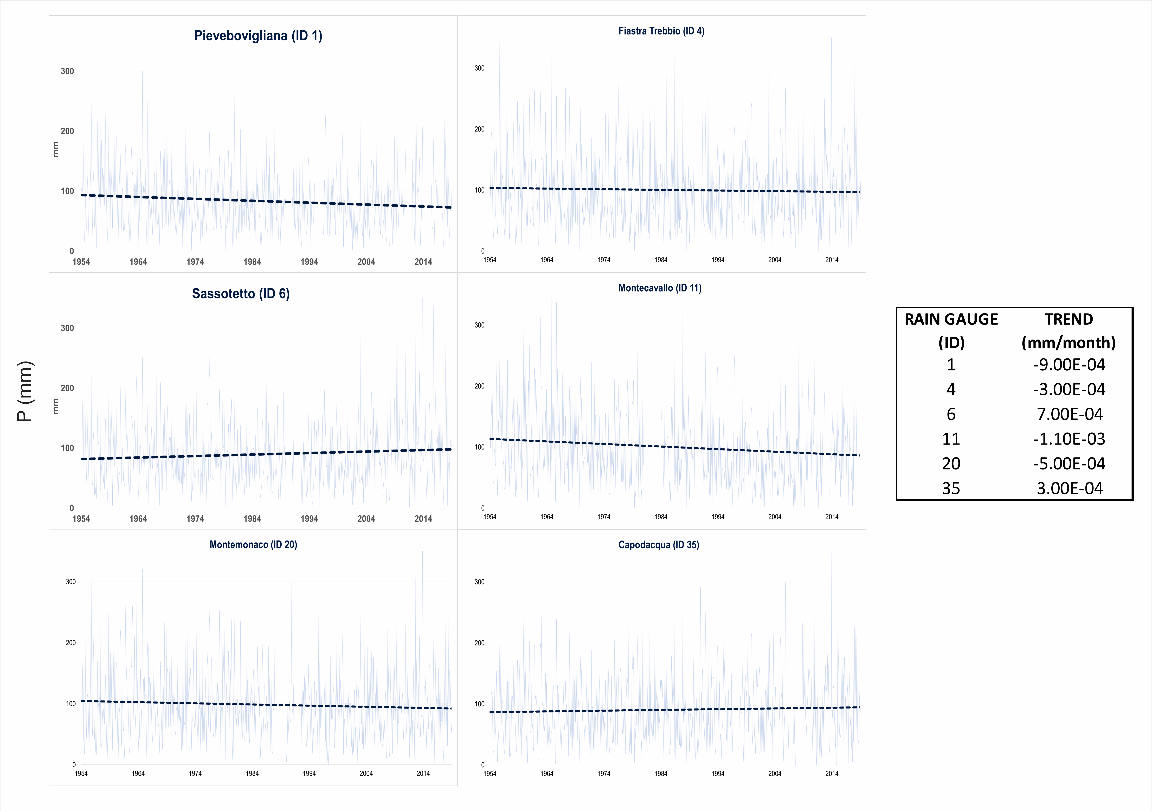


Fig. S3 Precipitation time series IDs refer to Fig. 1a and Table S1.


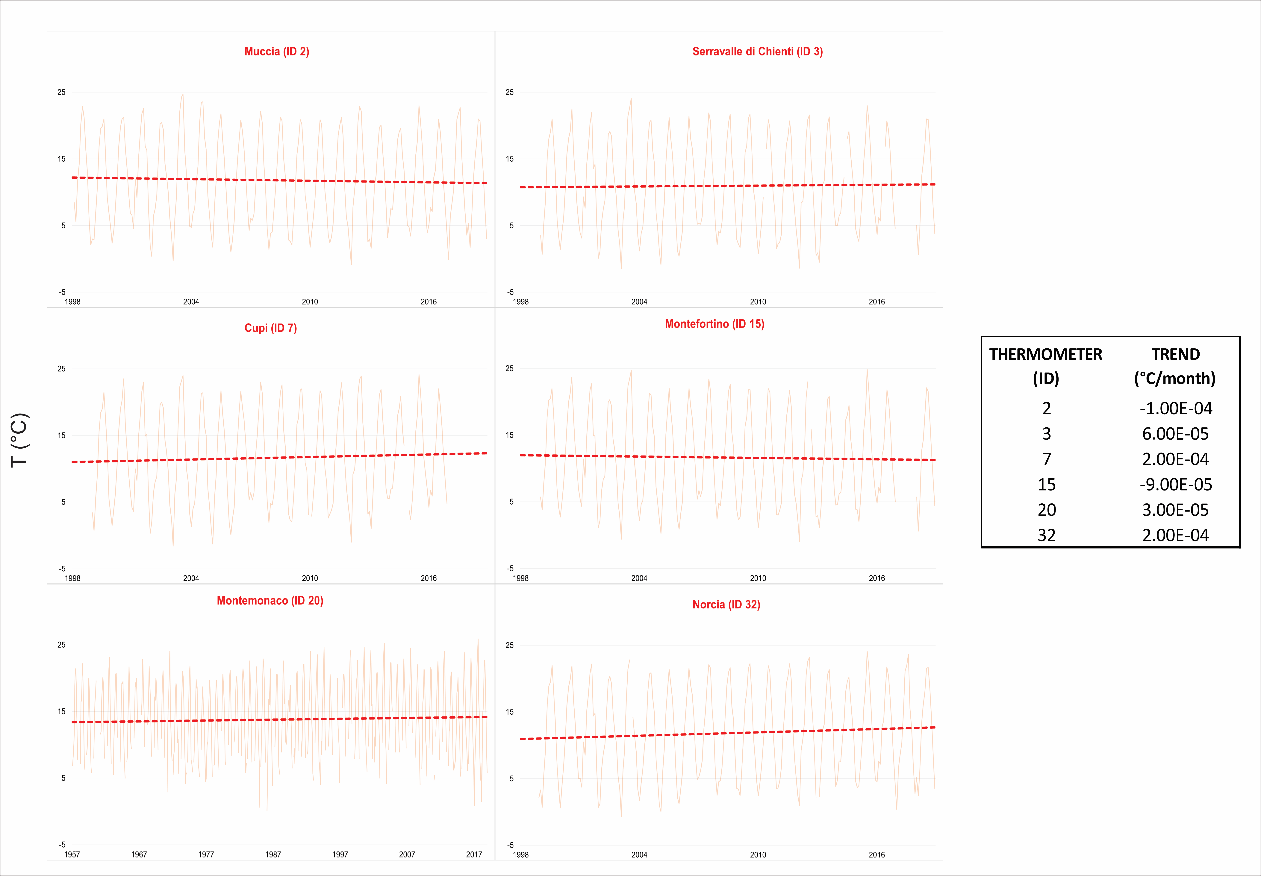


Fig. S4 Further temperature time series. IDs refer to Fig. 1a and Table S1.


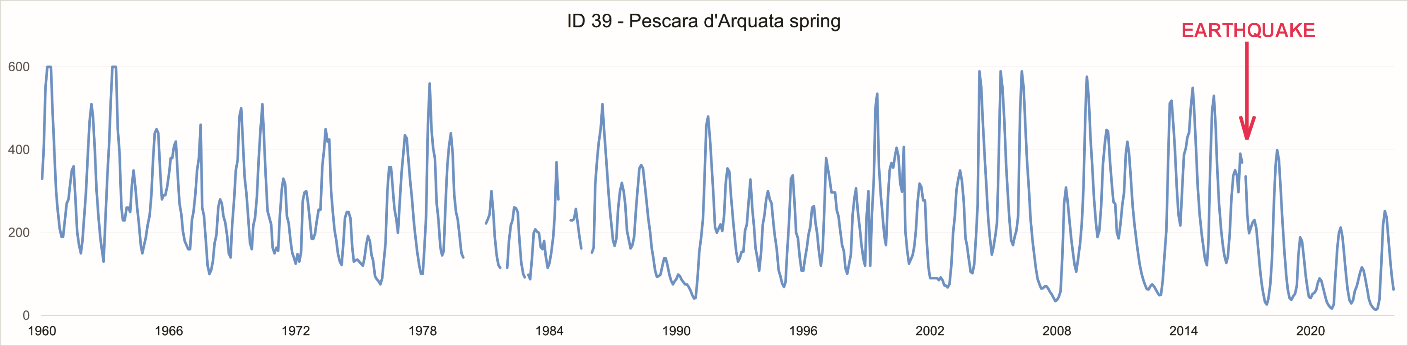


Fig. S5 Pescara d’Arquata spring hydrograph. The sharp decrease in discharge following the 2016 earthquake is evident.


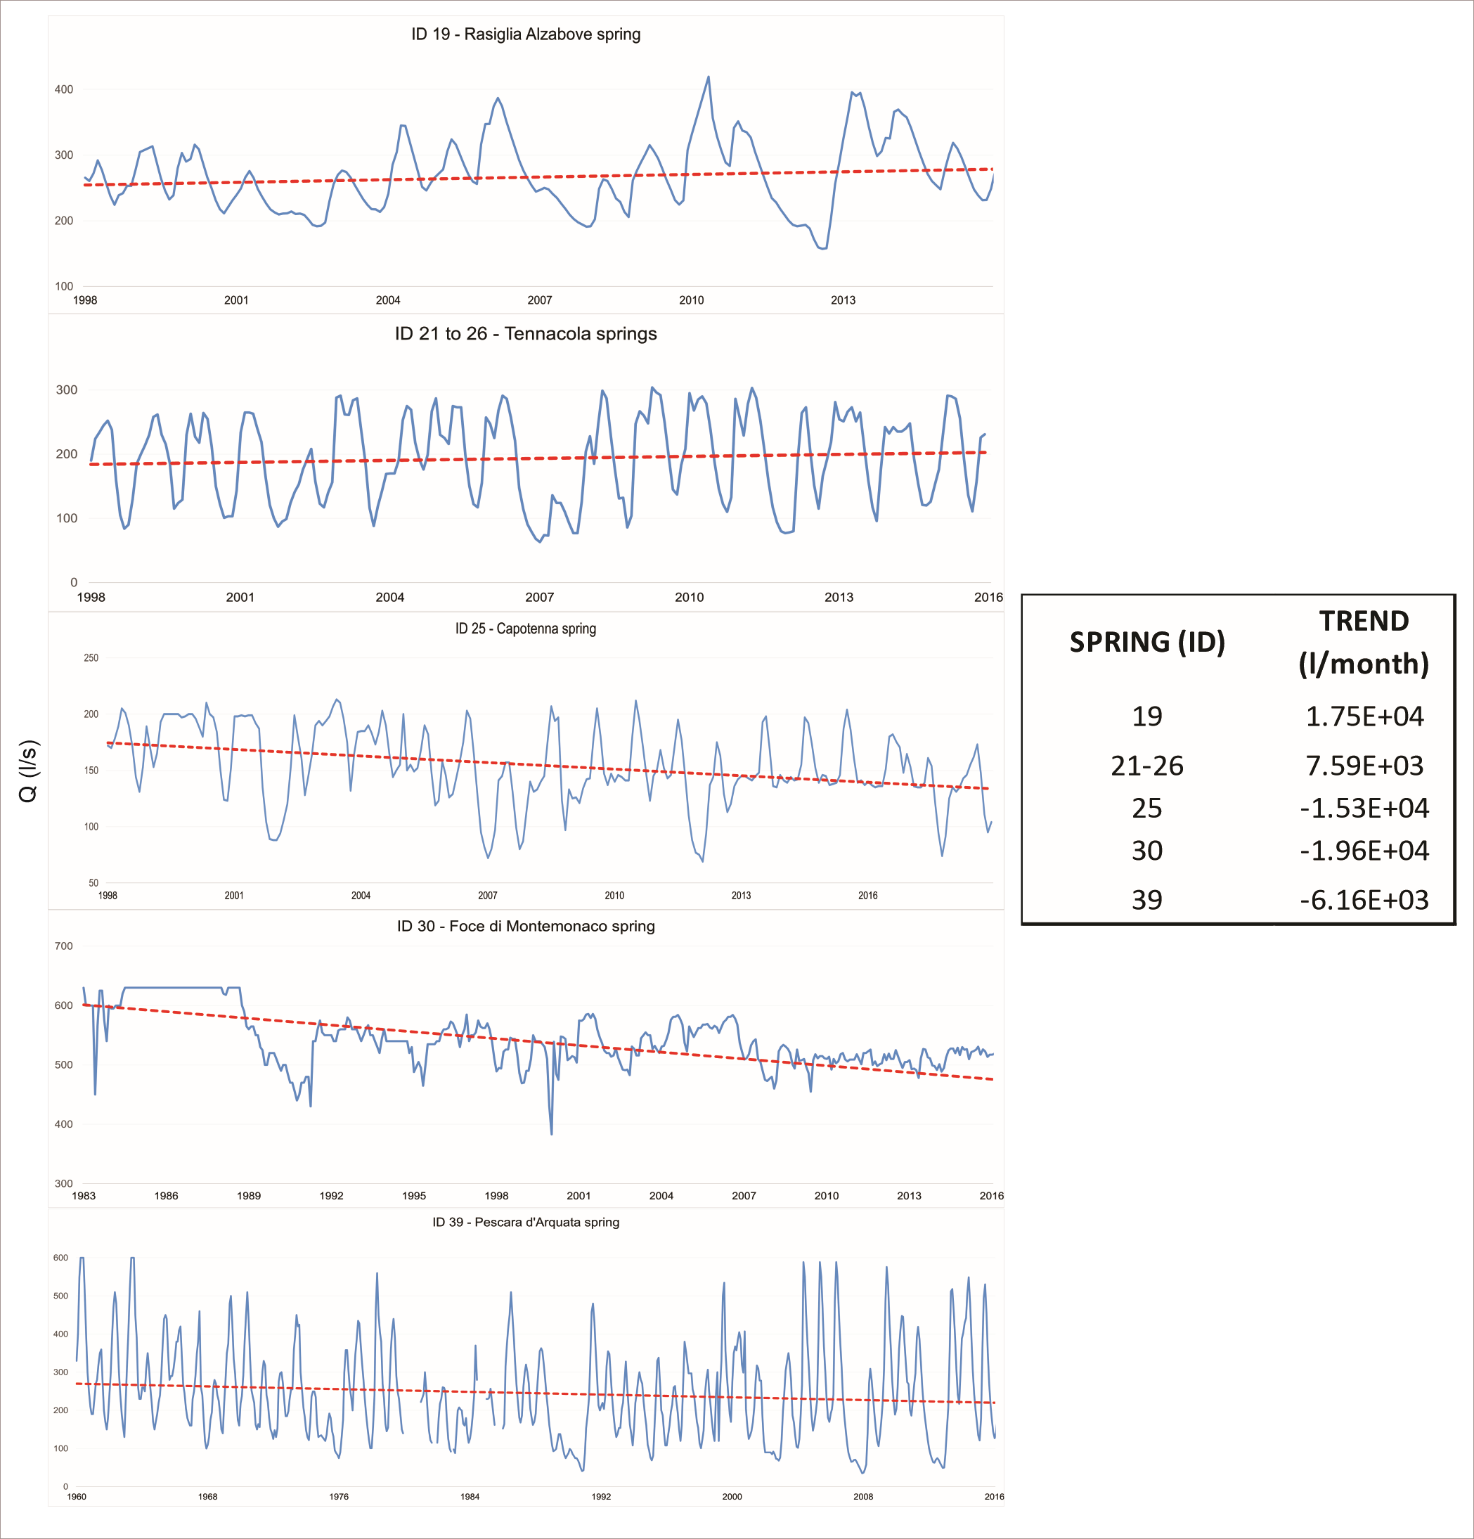


Fig. S6 Monthly spring hydrographs with trends (CIIP and ARPA Umbria) truncated to 2015 to exclude the earthquake-related groundwater upheavals. IDs refer to Fig. 1a and Table S2.


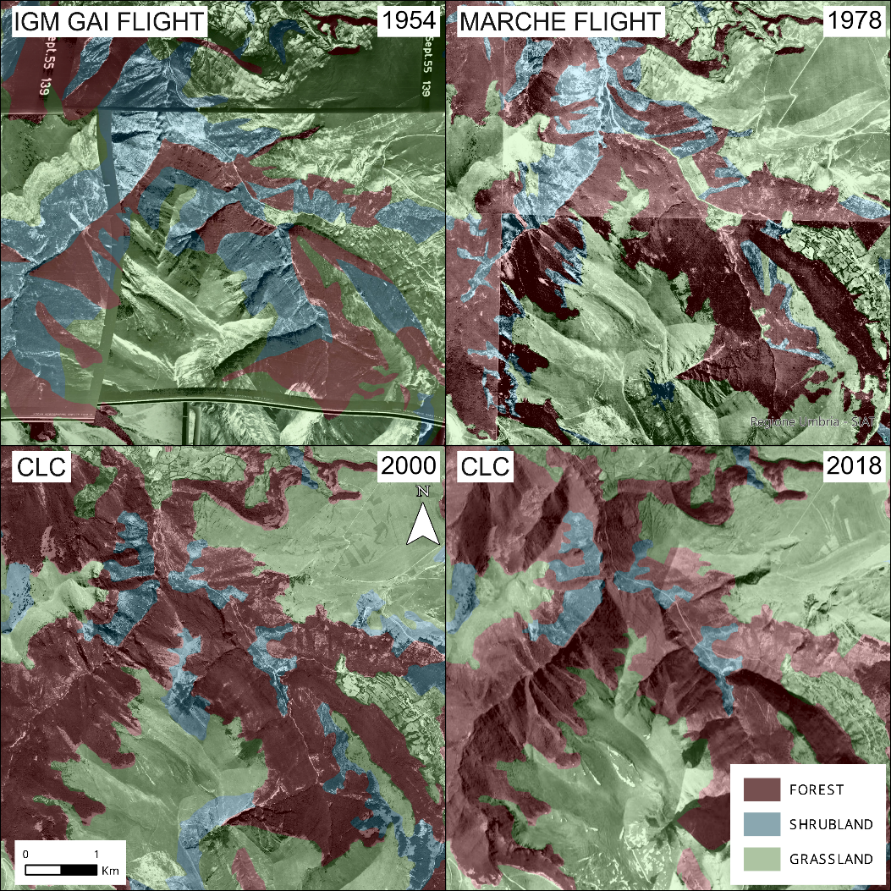


Fig. S7 The different land use databases (IGM, MF, CLC 2000 and CLC 2018).


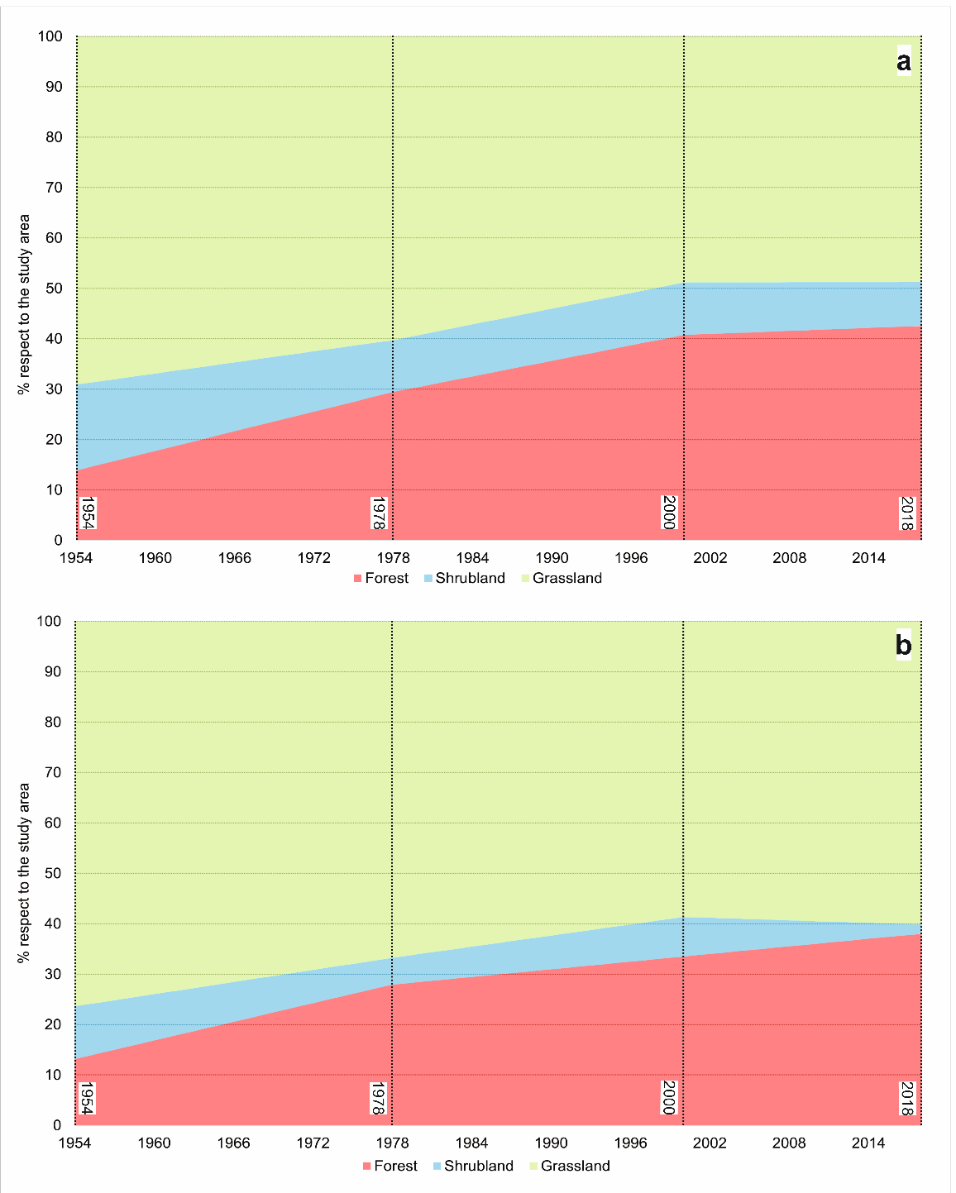


Fig. S8 a) Land use change (%) over time inside the study area; b) Land use change (%) over time inside the Pescara d’Arquata spring catchment (= test site).

| **Land use category** | **Kc – lower boundary** | **Method/Bibliography** | **Kc – upper boundary** | **Method/Bibliography** |
| --- | --- | --- | --- | --- |
| Forest | 0.72 | Area-weighted mean: 0.70 – broad-leaved forest (Fagus sylvatica; Chiesi et al., 2018), 1.0 – conifers (Allen et al., 1998), 0.85 – mixed forest (average between broad-leaved and conifers) | 0.85 | Area-weighted mean: 0.84 – broad-leaved forest (Fagus sylvatica Kc-curve; Verstraeten et al. 2005), 1.0 – conifers (Allen et al., 1998), 0.92 – mixed forest (average between broad-leaved and conifers) |
| Shrubland | 0.5 | Kc-curve semi-natural shrublands (Pereira et al., 2023) | 0.64 | (Lu et al., 2011) |
| Grassland | 0.37 | NDVI-Kc correlation (Kamble et al., 2013); NDVI (0.4) computed inside the grassland area within the entire study area | 0.58 | Extensive grazing Kc-curve (Allen et al., 1998) |

Table S4 Kc-summary table with relative methodology and bibliography.


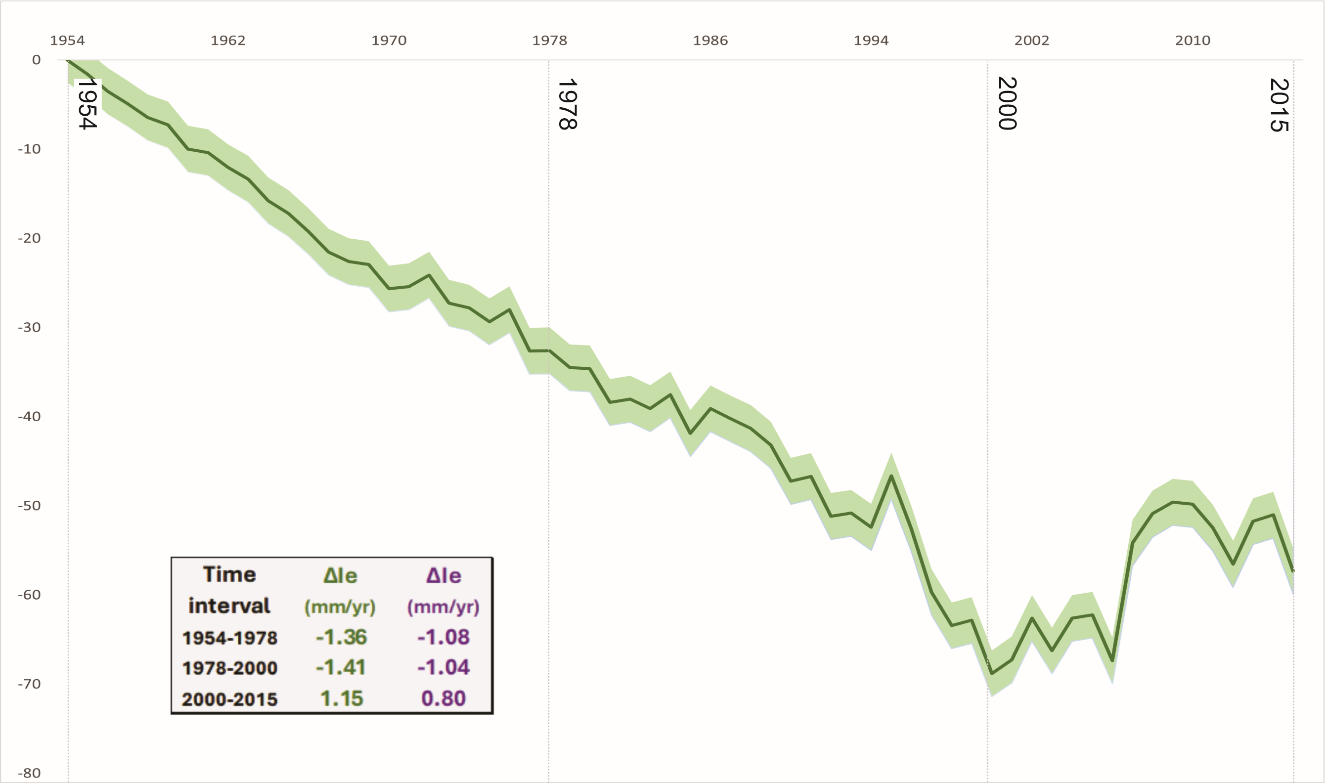


Fig. S9 Change in effective infiltration (ΔIe) for the different time windows (lower Kc boundary). The table reports the ΔIe annual variation rate for the different time intervals (green – lower Kc boundary, purple – higher Kc boundary).

REFERENCES

Aerial photos of Marche Flight (1977-1979) [WWW Document], n.d. . https://dati.regione.marche.it/ca/dataset/cartografia-regionale-ortofoto-volo-marche-1977-78-79.

Allen, R.G., Pereira, L.S., Raes, D., Smith, M., 1998. Crop Evapotranspiration (guidelines for computing crop water requirements).

AMAP - Marche region Agriculture and Fishing Agency [WWW Document], n.d. . https://www.amap.marche.it/.

ARPA Umbria [WWW Document], n.d. . https://www.arpa.umbria.it/.

ARSIAL - Lazio region Agrometeorological Service [WWW Document], n.d. . https://www.arsial.it/.

Boni, C., Petitta, M., 2007. Studio idrogeologico per l’identificazione e la caratterizzazione degli acquiferi che alimentano le sorgenti dei corsi d’acqua perenni dei monti sibillini, esteso all’intera area del parco nazionale.

Chiesi, M., Battista, P., Fibbi, L., Gardin, L., Pieri, M., Rapi, B., Romani, M., Maselli, F., 2018. A Semiempirical Method to Estimate Actual Evapotranspiration in Mediterranean Environments. Advances in Meteorology 2018. https://doi.org/10.1155/2018/9792609

CIIP spa - Home [WWW Document], n.d. URL https://www.ciip.it/ (accessed 11.20.24).

Copernicus, 2018. CORINE Land Cover 2018 (vector), Europe, 6-yearly - version 2020_20u1, May 2020 [WWW Document]. URL https://sdi.eea.europa.eu/catalogue/copernicus/api/records/71c95a07-e296-44fc-b22b-415f42acfdf0?language=all (accessed 11.20.24).

Copernicus, 2000. CORINE Land Cover 2000 (vector), Europe, 6-yearly - version 2020_20u1, May 2020 [WWW Document]. URL https://sdi.eea.europa.eu/catalogue/copernicus/api/records/8b85b479-6afb-42c6-817c-11d1a5260b83?language=all (accessed 11.20.24).

IGM GAI - Aerial photos of IGM GAI flight (1954-1955) [WWW Document], n.d. . https://www.igmi.org/geoprodotti/foto-aeree/1954.

Kamble, B., Kilic, A., Hubbard, K., 2013. Estimating crop coefficients using remote sensing-based vegetation index. Remote Sens (Basel) 5, 1588–1602. https://doi.org/10.3390/rs5041588

Lu, N., Chen, S., Wilske, B., Sun, G., Chen, J., 2011. Evapotranspiration and soil water relationships in a range of disturbed and undisturbed ecosystems in the semi-arid Inner Mongolia, China. Journal of Plant Ecology 4, 49–60. https://doi.org/10.1093/jpe/rtq035

PC Lazio - Lazio region Civil Protection Agency [WWW Document], n.d. . https://protezionecivile.regione.lazio.it/gestione-emergenze/centro-funzionale/rete-idrometeorologica.

Pereira, L.S., Paredes, P., Espírito-Santo, D., Salman, M., 2023. Actual and standard crop coefficients for semi-natural and planted grasslands and grasses: a review aimed at supporting water management to improve production and ecosystem services. Irrig Sci. https://doi.org/10.1007/s00271-023-00867-6

SIR Umbria - Umbria region Hydrographic Service [WWW Document], n.d. . https://annali.regione.umbria.it/.

SIRMIP - Marche region Civil Protection Agency Information System [WWW Document], n.d. . http://app.protezionecivile.marche.it/sol/indexjs.sol?lang=it.

Tennacola SpA [WWW Document], n.d. . https://www.tennacola.it/.

Verstraeten, W.W., Muys, B., Feyen, J., Veroustraete, F., Minnaert, M., Meiresonne, L., De Schrijver, A., 2005. Comparative analysis of the actual evapotranspiration of Flemish forest and cropland, using the soil water balance model WAVE, Hydrology and Earth System Sciences.
